# Supplementary material for: Effects of dietary supplementation with in vitro-cultivated arboreal medicinal mushrooms on stress coping strategies, depressive and anxiety-like behaviour of rats.
Source: Research Square preprint supplement (doi:10.21203/rs.3.rs-6118750/v1), 2025-03-13
Supplement: Supplementary file 1 [file fa6cc36b5323b3e10d015c5c.pdf]

- *Fomitopsis officinalis*
  - *Hericium erinaceus*
  - *Pleurotus djamor*
- (100, 250 and 500 mg mycelium/kg of body weight in 2 mL of 2% CMC)

- Fluoxetine 20 mg/kg of body weight

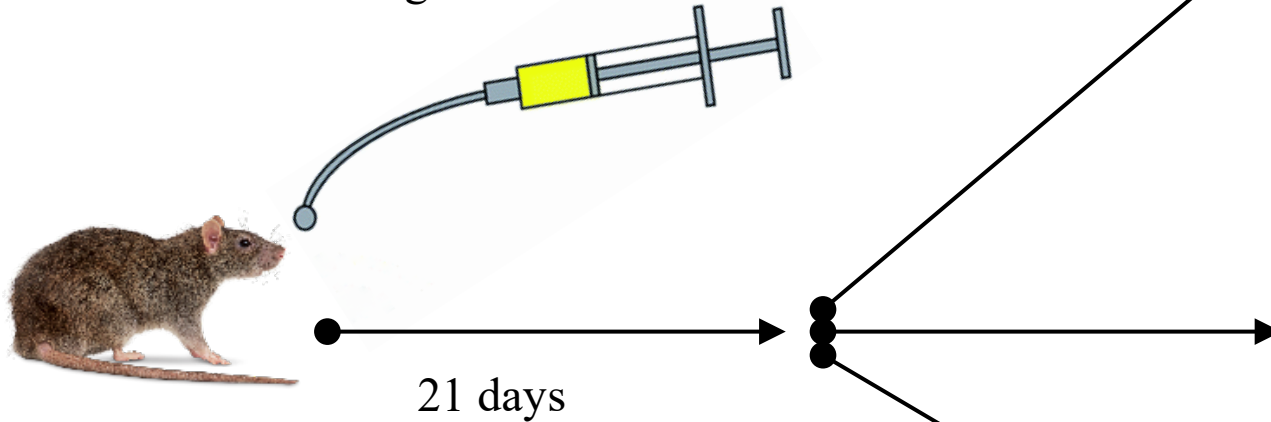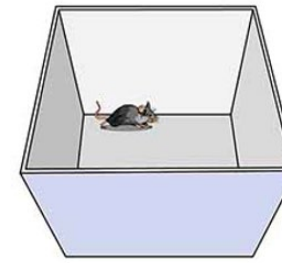

Open field

- ❑ *Fomitopsis officinalis* at a dose of 250 mg/kg, increased threefold the occurrence of exploratory/orienting behaviour

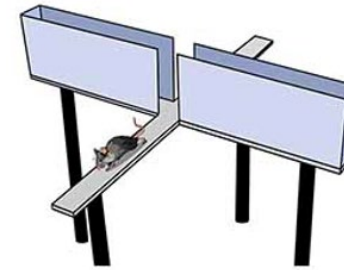

Elevated Plus maze

- ❑ 100 mg/kg of *Fomitopsis officinalis* as well *Pleurotus djamor* mycelium showed an anxiolytic effect.

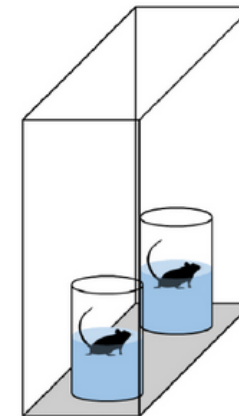

Forced swimming test

- ❑ 250 and 500 mg/kg of *Fomitopsis officinalis* as well *Hericium erinaceus* and *Pleurotus djamor* mushrooms have shown antidepressant effects.
